# Supplementary material for: Identification and Expression Profiling of the BTB Domain-Containing Protein Gene Family in the Silkworm,Bombyx mori
Source: Hindawi journal article supplement (doi:10.1155/2014/865065), 2014-01-01
Supplement: f1 [file 865065.f1.pdf]

**Table S1 List of primers used in this study**

| <b>Gene</b>   | <b>Sense (5' to 3')</b>  | <b>Antisense (5' to 3')</b> |
|---------------|--------------------------|-----------------------------|
| <i>BTBD7</i>  | AGAACATCATTCAAACGGGGAG   | ATCGGATGTTGTGTTGGATTCA      |
| <i>BTBD8</i>  | GCTTATTGGGCAACAGCGAGT    | TCTGCAAAACCTCTGCTGTACCT     |
| <i>BTBD13</i> | TAGTCATGGCAGTGAAATGGAAA  | GAAATGCAATGGCTATGTACAGG     |
| <i>BTBD19</i> | CTGAGTCGTCGCCAAAGCAT     | CGATGGGCCAAATGTATGC         |
| <i>ABTB2</i>  | TCACGAAGAGTCAGTCAGTTAGGA | AAGATATACGATTTGATGGCGC      |
| <i>BBP2</i>   | TGTCTCCACCACACACTGTATCAC | GCAGCGTTTCTCTCTCGAAC        |
| <i>BBK1</i>   | ACGCTGATGGCGACAGAGAA     | GCATCTTGTCTCAACCTCGCTA      |
| <i>BBK2</i>   | CCCACACCTCGGAGAAACATC    | CAGTGAACATCGCTCGGAAGT       |
| <i>BBK4</i>   | TGCTATGCGACGCTATTGTG     | GCGGAGGTAGGCGTACTCAA        |
| <i>BBK6</i>   | TGATAAGGGACACGCTGAAGTAG  | TGAGTCAATGCGCTCAAGTGTA      |
| <i>KBTB</i>   | GGAACCCGAATGAACTGGATA    | ATACCATAACAGCCCATTTTAGTC    |
| <i>ZBTB2</i>  | GAAGAAGATTCCGGCTAAGTCGC  | AGCTGTGCTTGTCTGGGGAT        |
| <i>ZBTB5</i>  | CGCTGGAACAACCACCCTAA     | GGCCAACATTTACTTCCCCC        |
| <i>ZBTB6</i>  | CGACGGGAAAAGCCTCAA       | CCTGGGCAGCGTCATTGTG         |
| <i>ZBTB8</i>  | GGTACTTTCGGCTTGTAGTCCATA | GCTTTTGAAGAAGAGGTAGAATGC    |
| <i>ZBTB13</i> | AGATGGGCATATGGTGCGAGT    | TCTAATGTGAAGTGCTTTCCCAG     |
| <i>ZBTB14</i> | GCACCAAGTCATAATCGCTCTG   | TCTTCAATTCTTTCGCTGCCTC      |
| <i>MBTB</i>   | ATCATCGACTTTCAGCTGGTG    | GTCTTTCCTTGCACGAATCTGT      |
| <i>RpL3</i>   | TCGTCATCGTGGTAAGGTCAA    | TTTGTATCCTTTGCCCTTGGT       |
