# Supplementary material for: Identification and Expression Profiling of the BTB Domain-Containing Protein Gene Family in the Silkworm,Bombyx mori
Source: Hindawi journal article supplement (doi:10.1155/2014/865065), 2014-01-01
Supplement: f2 [file 865065.f2.pdf]

Table S2\_Inventory of BTB proteins in other insects

| Subfamily    | <i>Drosophila melanogaster</i> |         |                | <i>Apis mellifera</i> |          |                | <i>Tribolium castaneum</i> |          |                        | <i>Danaus plexippus</i> |          |                      |
|--------------|--------------------------------|---------|----------------|-----------------------|----------|----------------|----------------------------|----------|------------------------|-------------------------|----------|----------------------|
|              | ID                             | Symbol  | Domain         | ID                    | Symbol   | Domain         | ID                         | Symbol   | Domain                 | ID                      | Symbol   | Domain               |
| BTB only     | CG11275                        | DmBTBD1 | BTB            | GB10603               | AmBTBD1  | BTB            | GLEAN_00415                | TcBTBD1  | BTB                    | DPOGS200522-PA          | DpBTBD1  | BTB                  |
|              | CG12052                        | DmBTBD2 | BTB            | GB10633               | AmBTBD2  | BTB            | GLEAN_03621                | TcBTBD2  | BTB                    | DPOGS202476-PA          | DpBTBD2  | BTB                  |
|              | CG13917                        | DmBTBD3 | BTB            | GB10960               | AmBTBD3  | BTB            | GLEAN_06410                | TcBTBD3  | BTB                    | DPOGS202712-PA          | DpBTBD3  | BTB                  |
|              | CG3726                         | DmBTBD4 | BTB            | GB12094               | AmBTBD4  | BTB            | GLEAN_09535                | TcBTBD4  | BTB                    | DPOGS203471-PA          | DpBTBD4  | BTB                  |
|              | CG5738                         | DmBTBD5 | BTB            | GB14408               | AmBTBD5  | BTB            | GLEAN_10343                | TcBTBD5  | BTB                    | DPOGS204086-PA          | DpBTBD5  | BTB                  |
|              | CG6118                         | DmBTBD6 | BTB            | GB14649               | AmBTBD6  | BTB            | GLEAN_10446                | TcBTBD6  | BTB                    | DPOGS205406-PA          | DpBTBD6  | BTB                  |
|              | CG5924                         | DmBTBD7 | BTB            | GB14696               | AmBTBD7  | BTB            | GLEAN_11439                | TcBTBD7  | BTB                    | DPOGS206029-PA          | DpBTBD7  | BTB                  |
|              | CG9343                         | DmBTBD8 | BTB            | GB15064               | AmBTBD8  | BTB            | GLEAN_13203                | TcBTBD8  | BTB                    | DPOGS208783-PA          | DpBTBD8  | BTB                  |
|              |                                |         |                | GB16366               | AmBTBD9  | BTB            | GLEAN_15126                | TcBTBD9  | BTB                    | DPOGS208924-PA          | DpBTBD9  | BTB                  |
|              |                                |         |                | GB18588               | AmBTBD10 | BTB            | GLEAN_15970                | TcBTBD10 | BTB                    | DPOGS209727-PA          | DpBTBD10 | BTB                  |
| BTB-BACK     |                                |         |                | GB20142               | AmBTBD11 | BTB            | GLEAN_08426                | TcBTBD11 | BTB                    | DPOGS210632-PA          | DpBTBD11 | BTB                  |
|              |                                |         |                | GB30549               | AmBTBD12 | BTB            |                            |          |                        | DPOGS212156-PA          | DpBTBD12 | BTB                  |
|              |                                |         |                |                       |          |                |                            |          |                        | DPOGS213543-PA          | DpBTBD13 | BTB                  |
|              | CG11250                        | DmABTB1 | ANK-BTB        | GB17271               | AmABTB1  | ANK-BTB        | GLEAN_07059                | TcABTB1  | ANK-BTB                | DPOGS215957-PA          | DpABTB1  | ANK-BTB              |
|              | CG8060                         | DmABTB2 | ANK-RCC1-BTB   | GB19019               | AmABTB2  | BTB-ANK-FYVE   | GLEAN_09632                | TcABTB2  | ANK-RCC1-BTB-BTB       | DPOGS214313-PA          | DpABTB2  | ANK-Tetraspannin-BTB |
|              | CG12423                        | DmBBTB1 | BTB-BACK       | GB11719               | AmBBTB1  | BTB-BACK       | GLEAN_00949                | TcBBTB1  | BTB-BACK               | DPOGS201858-PA          | DpBBTB1  | BTB-BACK             |
|              | CG1826                         | DmBBTB2 | BTB-BACK       | GB12345               | AmBBTB2  | BTB-BACK       | GLEAN_09541                | TcBBTB2  | BTB-BACK               | DPOGS204938-PA          | DpBBTB2  | BTB-BACK             |
|              | CG1841                         | DmBBTB3 | BTB-BACK       |                       |          |                | GLEAN_14707                | TcBBTB3  | BTB-BACK               | DPOGS205931-PA          | DpBBTB3  | BTB-BACK             |
|              | CG16952                        | DmBBTB4 | BTB-BTB-BACK   |                       |          |                | GLEAN_12366                | TcBBTB4  | BTB-BACK-C2H2          | DPOGS212344-PA          | DpBBTB4  | BTB-BACK             |
|              |                                |         |                |                       |          |                | GLEAN_01623                | TcBBTB5  | BTB-BTB-BACK           |                         |          |                      |
| BTB-BACK-PHR |                                |         |                | GB17866               | AmBBP    | BTB-BACK-PHR   |                            |          |                        | DPOGS201089-PA          | DpBBP1   | BTB-BACK-PHR         |
|              |                                |         |                |                       |          |                |                            |          |                        | DPOGS214572-PA          | DpBBP2   | BTB-BACK-PHR         |
|              | CG17754                        | DmBBK1  | BTB-BACK-Kelch | GB11323               | AmBBK1   | BTB-BACK-Kelch | GLEAN_05972                | TcBBK1   | BTB-BACK-Kelch         | DPOGS201838-PA          | DpBBK1   | BTB-BACK-Kelch       |
|              | CG1812                         | DmBBK2  | BTB-BACK-Kelch | GB12199               | AmBBK2   | BTB-BACK-Kelch | GLEAN_06676                | TcBBK2   | BTB-BACK-Kelch         | DPOGS203216-PA          | DpBBK2   | BTB-BACK-Kelch       |
|              | CG3571                         | DmBBK3  | BTB-BACK-Kelch | GB13707               | AmBBK3   | BTB-BACK-Kelch | GLEAN_10393                | TcBBK3   | BTB-BACK-Kelch         | DPOGS206094-PA          | DpBBK3   | BTB-BACK-Kelch       |
|              | CG3962                         | DmBBK4  | BTB-BACK-Kelch | GB13968               | AmBBK4   | BTB-BACK-Kelch | GLEAN_12393                | TcBBK4   | BTB-BACK-Kelch         | DPOGS207551-PA          | DpBBK4   | BTB-BACK-Kelch       |
|              | CG6224                         | DmBBK5  | BTB-BACK-Kelch | GB14950               | AmBBK5   | BTB-BACK-Kelch | GLEAN_12547                | TcBBK5   | BTB-BACK-Kelch         | DPOGS208488-PA          | DpBBK5   | BTB-BACK-Kelch       |
|              | CG7210                         | DmBBK6  | BTB-BACK-Kelch | GB14989               | AmBBK6   | BTB-BACK-Kelch | GLEAN_12628                | TcBBK6   | BTB-BACK-Kelch         | DPOGS213184-PA          | DpBBK6   | BTB-BACK-Kelch       |
|              | CG9426                         | DmBBK7  | BTB-BACK-Kelch | GB19993               | AmBBK7   | BTB-BACK-Kelch | GLEAN_13883                | TcBBK7   | BTB-BACK-Kelch         |                         |          |                      |
|              |                                |         |                |                       |          |                | GLEAN_15037                | TcBBK8   | BTB-BACK-Kelch         |                         |          |                      |
| BTB-Kelch    |                                |         |                |                       |          |                | GLEAN_16270                | TcBBK9   | BTB-BACK-Kelch         |                         |          |                      |
|              |                                |         |                |                       |          |                | GLEAN_00194                | TcBBK10  | G_patch-BTB-BACK-Kelch |                         |          |                      |
|              | CG3711                         | DmKBTB  | BTB-Kelch      |                       |          |                | GLEAN_09594                | TcKBTB   | BTB-Kelch              | DPOGS207008-PA          | DpKBTB   | Kelch-BTB            |
|              | CG11491                        | DmZBTB1 | BTB-C2H2       | GB10751               | AmZBTB1  | BTB-C2H2       | GLEAN_01442                | TcZBTB1  | BTB-C2H2               | DPOGS201452-PA          | DpZBTB1  | BTB-C2H2             |
|              | CG12236                        | DmZBTB2 | BTB-C2H2       | GB11420               | AmZBTB2  | BTB-C2H2       | GLEAN_03097                | TcZBTB2  | BTB-C2H2               | DPOGS202607-PA          | DpZBTB2  | BTB-C2H2             |
|              | CG1856                         | DmZBTB3 | BTB-C2H2       | GB12001               | AmZBTB3  | BTB-C2H2       | GLEAN_05474                | TcZBTB3  | BTB-C2H2               | DPOGS203320-PA          | DpZBTB3  | BTB-C2H2             |
|              | CG31666                        | DmZBTB4 | BTB-C2H2       | GB13949               | AmZBTB4  | BTB-C2H2       | GLEAN_05851                | TcZBTB4  | BTB-C2H2               | DPOGS204256-PA          | DpZBTB4  | BTB-C2H2             |
|              | CG32121                        | DmZBTB5 | BTB-C2H2       | GB14319               | AmZBTB5  | BTB-C2H2       | GLEAN_05966                | TcZBTB5  | BTB-C2H2               | DPOGS205830-PA          | DpZBTB5  | BTB-C2H2             |
|              | CG32611                        | DmZBTB6 | BTB-C2H2       | GB15346               | AmZBTB6  | BTB-C2H2       | GLEAN_10050                | TcZBTB6  | BTB-C2H2               | DPOGS207435-PA          | DpZBTB6  | BTB-C2H2             |
|              | CG4807                         | DmZBTB7 | BTB-C2H2       | GB17083               | AmZBTB7  | BTB-C2H2       | GLEAN_11137                | TcZBTB7  | BTB-C2H2               | DPOGS207933-PA          | DpZBTB7  | BTB-C2H2             |
| BTB-ZF(C2H2) | CG5575                         | DmZBTB8 | BTB-C2H2       | GB18560               | AmZBTB8  | BTB-C2H2       | GLEAN_12894                | TcZBTB8  | BTB-C2H2               | DPOGS207965-PA          | DpZBTB8  | BTB-C2H2             |
|              | CG6384                         | DmZBTB9 | BTB-C2H2       | GB18625               | AmZBTB9  | BTB-C2H2       | GLEAN_12994                | TcZBTB9  | BTB-C2H2               | DPOGS209522-PA          | DpZBTB9  | BTB-C2H2             |
